# Supplementary material
Source: HighWire-hosted journal article supplement (http://www.jneurosci.org/highwire/filestream/598855/field_highwire_adjunct_files/1/S2_SMA560CRCLvaccTumorD34scatter.pdf)
Supplement: S2_SMA560CRCLvaccTumorD34scatter.pdf [file S2_SMA560CRCLvaccTumorD34scatter.pdf]

## Day 34 SMA 560 Tumor Load

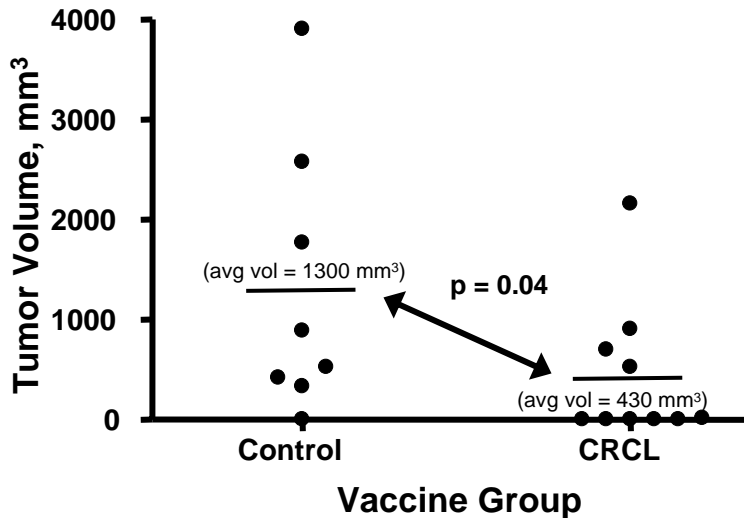

Vaccination with SMA560 Chaperone-Rich Cell Lysate (CRCL) reduces tumor burden in syngeneic, tumor-bearing mice. Groups of VM/Dk mice (10 per group initially) were inoculated sc with 100,000 SMA60 cells. Five days later one group of mice received injections of CRCL vaccines (50  $\mu$ g) derived from SMA560 tumor. Control mice received equal volumes of saline. Injections were given on the flank opposite the tumor. Tumor growth was monitored thereafter. Prior to day 34 2 mice in the control group had died from their tumors and their tumor volumes were censored from the averages and statistics shown here.
